# Supplementary material for: Hyperstable chromium(iii)/manganese(ii) bimetallic wheel clusters with visible photoactivity
Source: Royal Society of Chemistry journal article supplement (doi:10.1039/c9dt02006c), 2019-01-01
Supplement: c9dt02006c1.pdf [file c9dt02006c1.pdf]

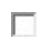

*Electronic Supplementary Information (ESI) for*

## Hyperstable Chromium(III)/Manganese(II) Bimetallic Wheel Cluster with Visible Photoactivity

**Table S1.** Crystal data and structure refinement summary for cluster of **1** and **2**.

| Complex Name                         | <b>1</b>                                                            | <b>2</b>                                                                        |
|--------------------------------------|---------------------------------------------------------------------|---------------------------------------------------------------------------------|
| CCDC No.                             | 1889241                                                             | 1818720                                                                         |
| Formulae                             | C <sub>112</sub> H <sub>88</sub> O <sub>40</sub> Cr <sub>7</sub> Mn | C <sub>92</sub> H <sub>72</sub> O <sub>28</sub> Cr <sub>4</sub> Mn <sub>4</sub> |
| Mol. wt.                             | 2492.76                                                             | 2164.05                                                                         |
| Crystal system                       | Tetragonal                                                          | Triclinic                                                                       |
| Space group                          | P 4/n n c                                                           | <i>P</i> -1                                                                     |
| Temperature (K)                      | 293                                                                 | 293                                                                             |
| Wavelength (Å)                       | 0.71073                                                             | 0.71073                                                                         |
| a, b, c /Å                           | a 16.8255(9)<br>b 16.8255(9)<br>c 23.4167(14)                       | a 14.682(2)<br>b 15.378(3)<br>c 24.143(4)                                       |
| $\alpha$ , $\beta$ , $\gamma$ /°     | 90,<br>90,<br>90                                                    | 74.940(5),<br>89.845(5),<br>65.801(5)                                           |
| V/ Å <sup>3</sup>                    | 6629.2(8)                                                           | 4768.0 (14)                                                                     |
| Z                                    | 2                                                                   | 2                                                                               |
| Density / g.cm <sup>-3</sup>         | 1.249                                                               | 1.507                                                                           |
| Abs. Coeff. /mm <sup>-1</sup>        | 0.716                                                               | 1.031                                                                           |
| F(000)                               | 2546                                                                | 2203                                                                            |
| Total no. of reflections             | 3365                                                                | 21666                                                                           |
| Reflections, $I > 2\sigma(I)$        | 1365                                                                | 14925                                                                           |
| Max. $2\theta$ /°                    | 27.517                                                              | 27.513                                                                          |
| Ranges<br>(h, k, l)                  | -21 ≤ h ≤ 21<br>-21 ≤ k ≤ 17<br>-30 ≤ l ≤ 30                        | -19 ≤ h ≤ 19<br>-19 ≤ k ≤ 19<br>-31 ≤ l ≤ 31                                    |
| Complete to $2\theta$ (%)            | 0.876                                                               | 98.9                                                                            |
| Restraints                           | 381                                                                 | 76                                                                              |
| Parameters                           | 189                                                                 | 1270                                                                            |
| Goof (F <sup>2</sup> )               | 1.067                                                               | 1.015                                                                           |
| Rindices [ $I > 2\sigma(I)$ ]        | 0.0876                                                              | 0.0451                                                                          |
| Rindices (all data)                  | 0.1996                                                              | 0.0795                                                                          |
| WR <sub>2</sub> [ $I > 2\sigma(I)$ ] | 0.1867                                                              | 0.1082                                                                          |
| WR <sub>2</sub> (all data)           | 0.2496                                                              | 0.1230                                                                          |

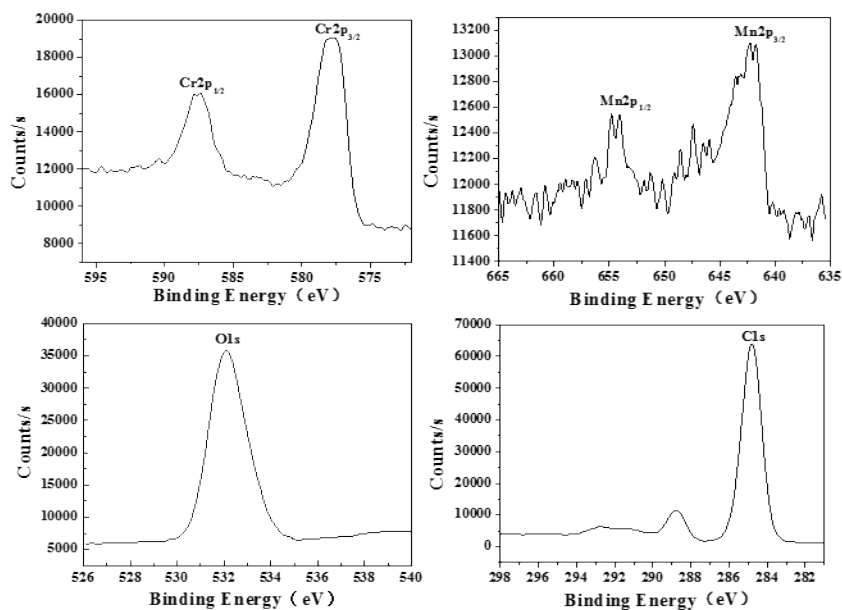

**Figure S1.** XPS high-resolution spectra of Cr 2p, Mn 2p, O 1s and C 1s core levels for cluster 1 indicates the existence oxidation state of (a)  $\text{Cr}^{3+}$  (577.8 eV for  $2p_{3/2}$  and 587.7 eV for  $2p_{1/2}$ ), (b)  $\text{Mn}^{2+}$  (642.3 eV for  $2p_{3/2}$  and 654.3 eV for  $2p_{1/2}$ ), (c) O 1s (532.1 eV), (d) C 1s (284.8 eV and 288.8 eV).

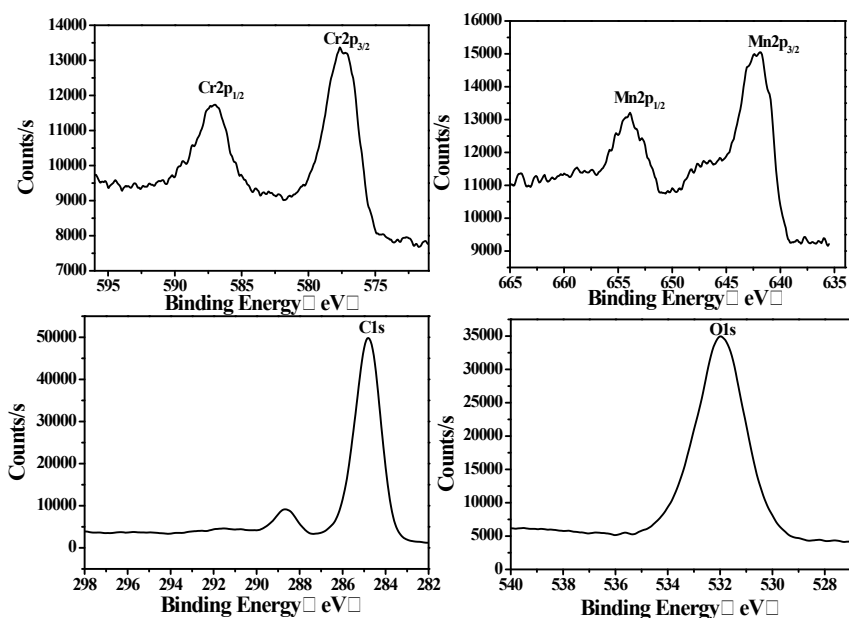

**Figure S2.** XPS high-resolution spectra of Cr 2p, Mn 2p, O 1s and C 1s core levels for cluster 2 indicates the existence oxidation state of (a)  $\text{Cr}^{3+}$  (577.4 eV for  $2p_{3/2}$  and 587.2 eV for  $2p_{1/2}$ ), (b)  $\text{Mn}^{2+}$  (642.1 eV for  $2p_{3/2}$  and 653.9 eV for  $2p_{1/2}$ ), (c) C 1s (284.8 eV and 288.7 eV), (d) O 1s (531.9 eV).

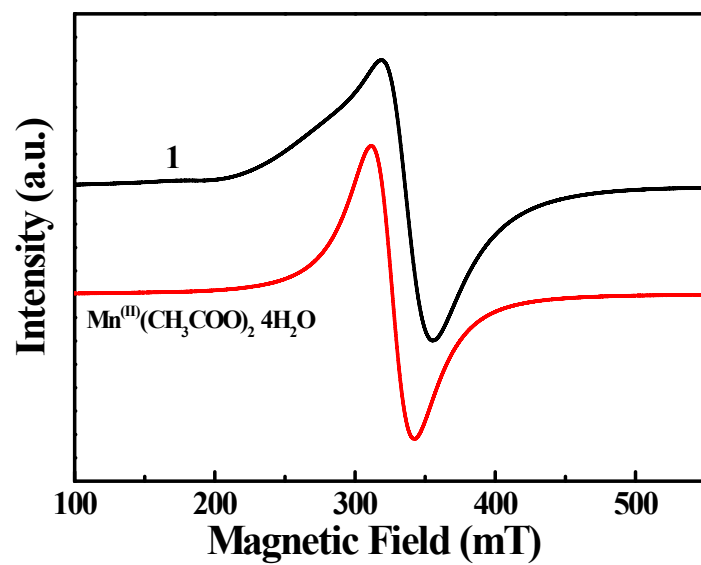

**Figure S3.** The ESR spectrum of **1** (black line) and manganese acetate tetrahydrate (red line).

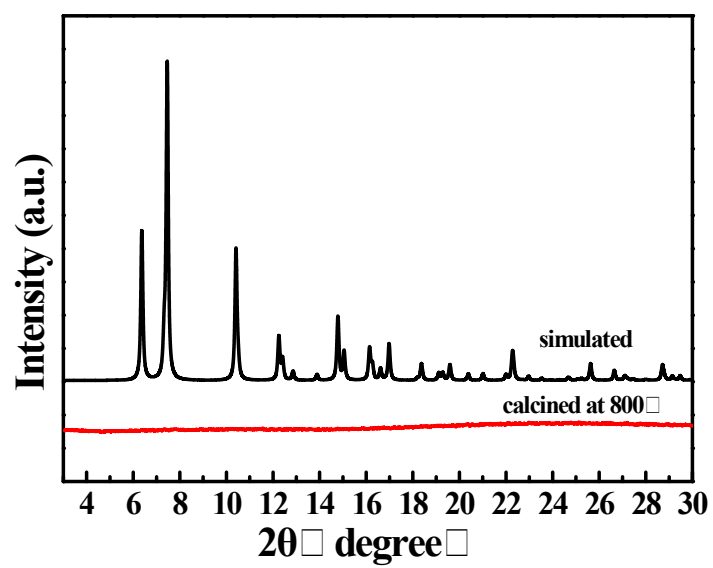

**Figure S4** Simulated XRD patterns of **1** from single-crystal X-ray diffraction data (black line) and PXRD pattern of **1** after calcined at 800 °C in Ar flow using tube furnace.

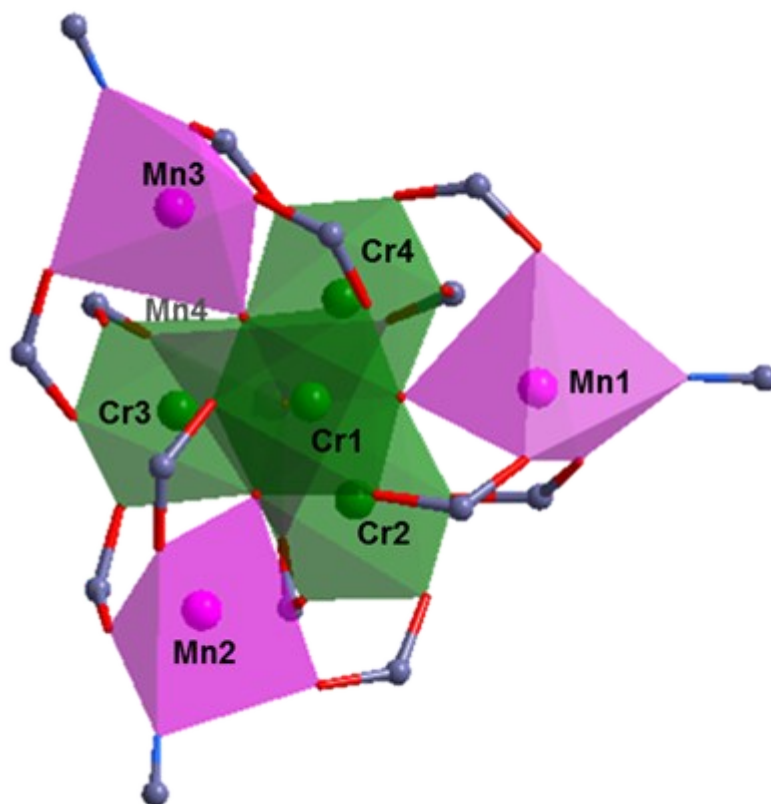

**Figure S5.** Polyhedral and ball-and-stick representations of **2**.

**Table S2.** Selected bond lengths (Å) and angles (°) for **2**.

| Lengths |        |        |       |  |
|---------|--------|--------|-------|--|
| Cr1-O1  | 1.959  | Mn4-O1 | 2.059 |  |
| Cr1-O2  | 1.967  | Mn4-O2 | 2.135 |  |
| Cr1-O3  | 1.966  | Mn4-O3 | 2.102 |  |
| Cr1-O4  | 1.988  | Mn4-O4 | 2.100 |  |
| Cr1-O5  | 1.988  | Mn4-O5 | 2.198 |  |
| Cr1-O6  | 2.004  | Mn1-O1 | 2.064 |  |
| Cr2-O1  | 1.9568 | Mn1-O2 | 2.073 |  |
| Cr2-O2  | 1.965  | Mn1-O3 | 2.088 |  |
| Cr2-O3  | 1.963  | Mn1-O4 | 2.070 |  |
| Cr2-O4  | 1.999  | Mn1-N  | 2.275 |  |
| Cr2-O5  | 1.985  | Mn2-O1 | 2.059 |  |
| Cr2-O6  | 1.993  | Mn2-O2 | 2.080 |  |
| Cr3-O1  | 1.958  | Mn2-O3 | 2.086 |  |
| Cr3-O2  | 1.967  | Mn2-O4 | 2.087 |  |
| Cr3-O3  | 1.968  | Mn2-N  | 2.224 |  |
| Cr3-O4  | 1.997  | Mn3-O1 | 2.061 |  |
| Cr3-O5  | 2.010  | Mn3-O2 | 2.095 |  |
| Cr3-O6  | 1.998  | Mn3-O3 | 2.093 |  |

|           |        |            |        |
|-----------|--------|------------|--------|
| Cr4-O1    | 1.970  | Mn3-O4     | 2.097  |
| Cr4-O2    | 1.970  | Mn3-N      | 2.231  |
| Cr4-O3    | 1.964  |            |        |
| Cr4-O4    | 1.987  |            |        |
| Cr4-O5    | 1.989  |            |        |
| Cr4-O6    | 2.003  |            |        |
| <hr/>     |        |            |        |
| Angles    |        |            |        |
| O1-Cr1-O2 | 83.21  | O1-Mn2-O2  | 96.48  |
| O1-Cr1-O3 | 83.26  | O1-Mn2-O3  | 93.63  |
| O1-Cr1-O4 | 95.38  | O1-Mn2-O4  | 94.10  |
| O1-Cr1-O5 | 175.72 | O1-Mn2-O5  | 174.14 |
| O1-Cr1-O6 | 94.26  | O2-Mn2-O5  | 87.9   |
| O2-Cr1-O3 | 82.14  | O2-Mn2-O3  | 118.05 |
| O2-Cr1-O4 | 93.96  | O2-Mn2-O4  | 118.70 |
| O2-Cr1-O5 | 94.42  | O3-Mn2-O4  | 121.24 |
| O2-Cr1-O6 | 176.95 | O3-Mn2-O5  | 87.7   |
| O3-Cr1-O4 | 175.98 | O4-Mn2-O5  | 80.3   |
| O3-Cr1-O5 | 92.89  | O1-Mn4-O2  | 92.71  |
| O3-Cr1-O6 | 95.89  | O1-Mn4-O3  | 94.77  |
| O4-Cr1-O5 | 88.34  | O1-Mn4-O4  | 93.88  |
| O4-Cr1-O6 | 87.97  | O1-Mn4-N2  | 175.3  |
| O5-Cr1-O6 | 87.99  | O12-Mn4-O3 | 116.1  |
| O1-Cr2-O2 | 82.69  | O12-Mn4-O4 | 118.6  |
| O1-Cr2-O3 | 83.14  | O2-Mn4-N2  | 91.4   |
| <hr/>     |        |            |        |
| O1-Cr2-O4 | 94.8   | O3-Mn4-O4  | 123.9  |
| O1-Cr2-O5 | 175.05 | O3-Mn4-N2  | 81.3   |
| O1-Cr2-O6 | 92.61  | O4-Mn4-N2  | 86.2   |
| O2-Cr2-O3 | 82.14  | O1-Mn3-O2  | 93.78  |
| O2-Cr2-O4 | 176.92 | O1-Mn3-O3  | 93.96  |
| O2-Cr2-O5 | 92.75  | O1-Mn3-O4  | 94.65  |
| O2-Cr2-O6 | 95.80  | O1-Mn3-N1  | 174.6  |
| O3-Cr2-O4 | 95.74  | O2-Mn3-O3  | 114.6  |
| O3-Cr2-O5 | 94.35  | O2-Mn3-O4  | 118.4  |
| O3-Cr2-O6 | 175.47 | O2-Mn3-N1  | 91.3   |
| O4-Cr2-O5 | 89.62  | O3-Mn3-O4  | 125.4  |
| O4-Cr2-O6 | 86.16  | O3-Mn3-N1  | 82.2   |
| O5-Cr2-O6 | 89.77  | O3-Mn3-N1  | 84.5   |
| O1-Cr3-O2 | 82.91  | O1-Mn1-O2  | 93.75  |
| O1-Cr3-O3 | 82.34  | O1-Mn1-O3  | 94.23  |
| O1-Cr3-O4 | 95.49  | O1-Mn1-O4  | 96.38  |
| O1-Cr3-O5 | 178.85 | O1-Mn1-N3  | 177.3  |
| O1-Cr3-O6 | 94.76  | O2-Mn1-O3  | 121.6  |
| O2-Cr3-O3 | 81.98  | O2-Mn1-O4  | 115.4  |
| <hr/>     |        |            |        |
| O2-Cr3-O4 | 95.81  | O2-Mn1-N3  | 83.8   |

|           |        |           |       |
|-----------|--------|-----------|-------|
| O2-Cr3-O5 | 96.10  | O3-Mn1-O4 | 120.9 |
| O2-Cr3-O6 | 177.20 | O3-Mn1-N3 | 86.1  |
| O3-Cr3-O4 | 177.06 | O4-Mn1-N3 | 85.7  |
| O3-Cr3-O5 | 96.95  |           |       |
| O3-Cr3-O6 | 96.19  |           |       |
| O4-Cr3-O5 | 85.18  |           |       |
| O4-Cr3-O6 | 85.95  |           |       |
| O5-Cr3-O6 | 86.22  |           |       |
| O1-Cr4-O2 | 82.85  |           |       |
| O1-Cr4-O3 | 82.67  |           |       |
| O1-Cr4-O4 | 94.90  |           |       |
| O1-Cr4-O5 | 175.86 |           |       |
| O1-Cr4-O6 | 94.62  |           |       |
| O2-Cr4-O3 | 82.68  |           |       |
| O2-Cr4-O4 | 95.21  |           |       |
| O2-Cr4-O5 | 93.71  |           |       |
| O2-Cr4-O6 | 177.17 |           |       |
| O3-Cr4-O4 | 176.95 |           |       |
| O3-Cr4-O5 | 94.63  |           |       |
| O3-Cr4-O6 | 95.77  |           |       |
| O4-Cr4-O5 | 87.68  |           |       |
| O4-Cr4-O6 | 86.25  |           |       |
| O5-Cr4-O6 | 88.77  |           |       |

**Table S3.** Summary of stability test of cluster **1** and **2** in different solvent for at least 24 h.

|                                 | <b>1</b> | <b>2</b> |
|---------------------------------|----------|----------|
| methanol                        | no       | yes      |
| ethanol                         | no       | yes      |
| CHCl <sub>3</sub>               | no       | yes      |
| CCl <sub>4</sub>                | no       | no       |
| CH <sub>2</sub> Cl <sub>2</sub> | no       | no       |
| acetone                         | no       | yes      |
| isopropanol                     | no       | yes      |
| propylene<br>oxide              | no       | yes      |
| cyclohexanol                    | no       | yes      |
| nitrobenzene                    | no       | no       |
| cyclohexane                     | no       | no       |
| DMSO                            | no       | yes      |
| DMF                             | yes      | yes      |

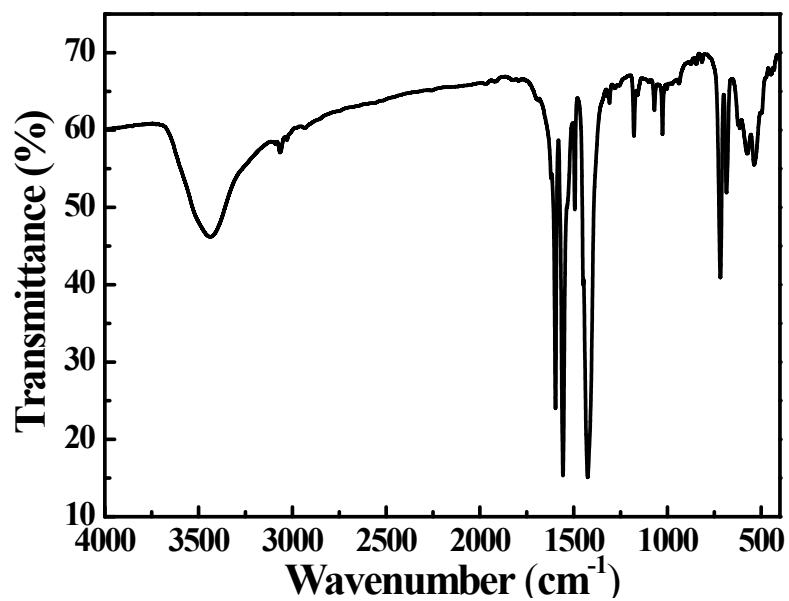

**Figure S6.** Infrared spectra of **1**: characteristic bands of the coordinated carboxylate in  $1400 - 1600 \text{ cm}^{-1}$  as well as  $M - O$  ( $M = \text{Cr, Mn}$ ) vibrations in  $400 - 800 \text{ cm}^{-1}$ , but no free carboxyl group vibrations in  $1650 - 1750 \text{ cm}^{-1}$ . The broad vibration around  $3400 \text{ cm}^{-1}$  arises from water molecules.

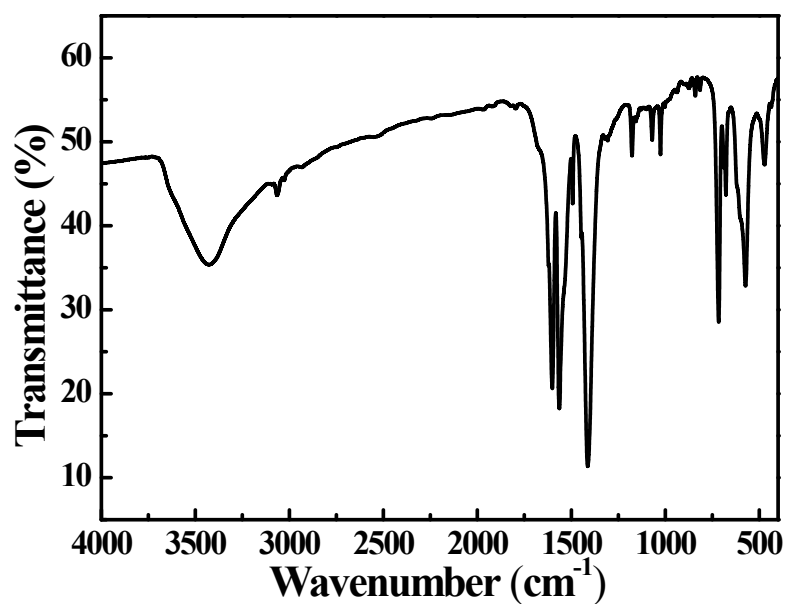

**Figure S7.** Infrared spectra of **2**: characteristic bands of the coordinated carboxylate in  $1400 - 1600 \text{ cm}^{-1}$  as well as  $M - O$  ( $M = \text{Cr, Mn}$ ) vibrations in  $400 - 800 \text{ cm}^{-1}$ , but no free carboxyl group vibrations in  $1650 - 1750 \text{ cm}^{-1}$ . The broad vibration around  $3400 \text{ cm}^{-1}$  arises from water molecules.

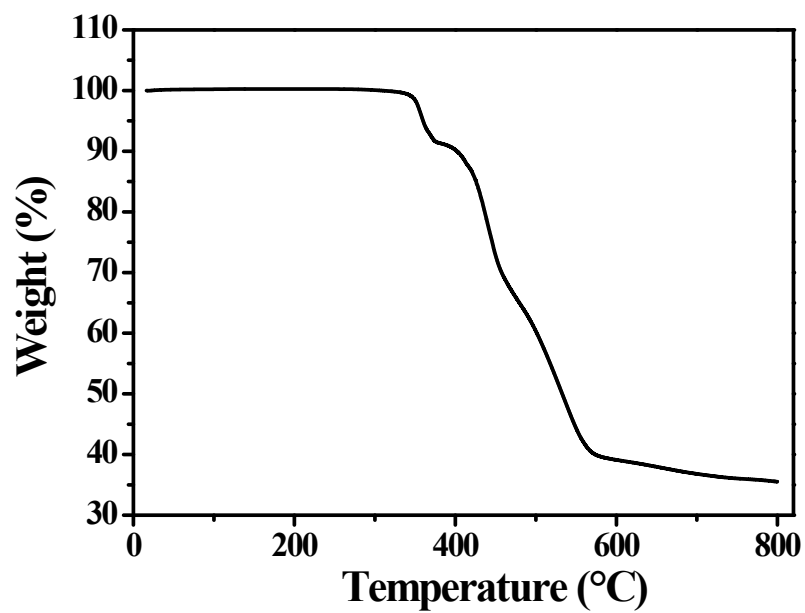

**Figure S8.** TG curve of cluster 1. The cluster can keep intact above 300 °C, following by decomposition of 1.

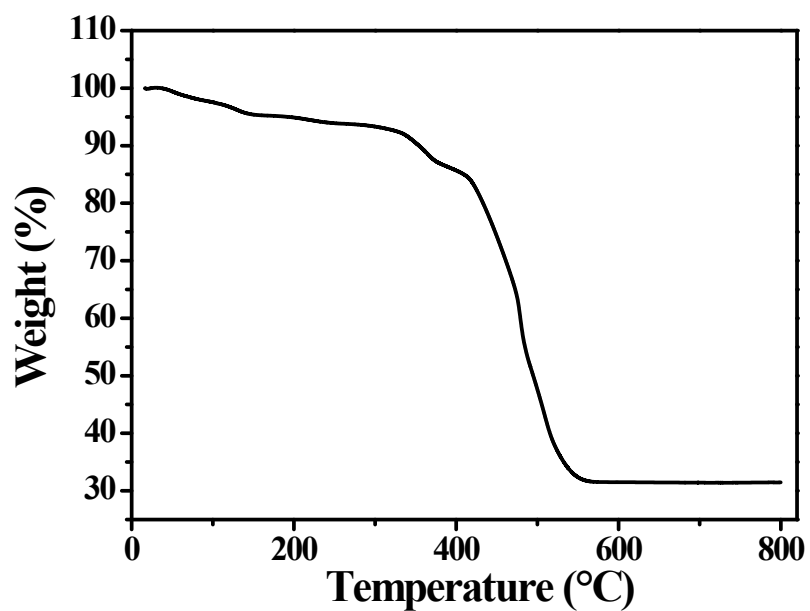

**Figure S9.** TG curve of cluster 2. The cluster can keep intact above 200 °C, following by decomposition of 2.



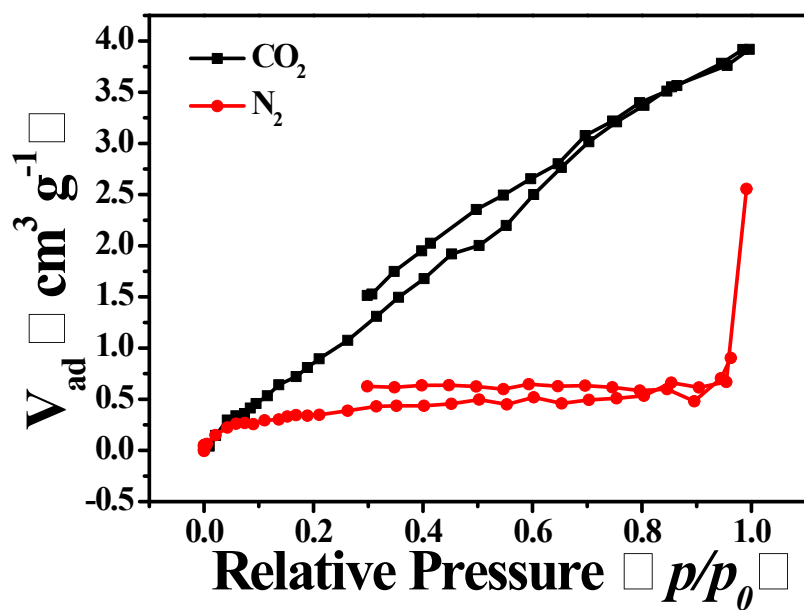

Figure S10.  $\text{CO}_2$  sorption isotherms at 298 K and  $\text{N}_2$  sorption isotherm at 77 K over evacuated **1**.

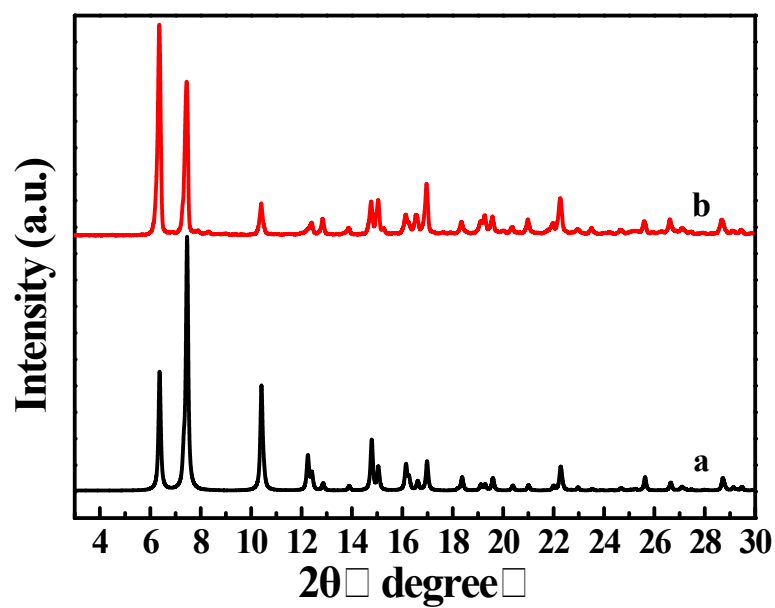

Figure S11. (a) Simulated XRD patterns of **1** nanocluster and (b) PXRD of  $\text{Cr}_8(\text{OH})_8(\text{OOCPh})_{16}$ .

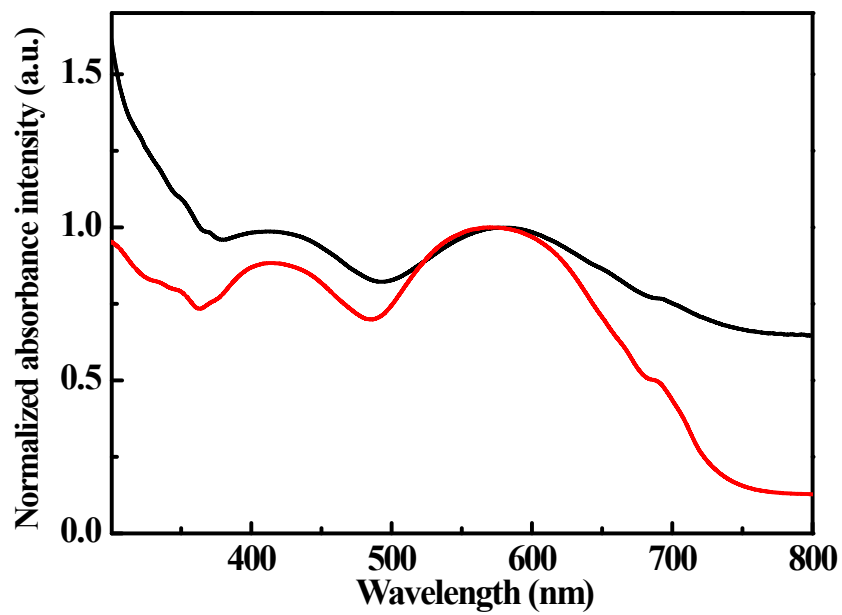

**Figure S12.** Normalized UV-Vis absorption spectrum of  $\text{Cr}_8(\text{OH})_8(\text{OOCPh})_{16}$  (black line) and crystalline **1** sample ( $\lambda_{\text{max}} = 571$  nm, red line).
